# Supplementary material for: Molecular mechanism of flavonoid-induced iron oxide transformation and implication for phosphorus loss risk in paddy soils
Source: Royal Society of Chemistry journal article supplement (doi:10.1039/d5em00177c), 2025-01-01
Supplement: d5em00177c1.pdf [file d5em00177c1.pdf]

## Supplementary Information

### **Molecular mechanism of flavonoids-inducing iron oxides transformation on phosphorus loss potential in paddy soils**

Wenjing Kang<sup>a,b</sup>, Xiaolei Huang<sup>a,d</sup>, Zhenyu Peng<sup>c</sup>, Carmen Enid Martínez<sup>b</sup>, Jian Xiao<sup>c\*</sup>, Wei Ran<sup>a\*\*</sup>,  
Qirong Shen<sup>a</sup>

<sup>a</sup> Jiangsu Provincial Key Lab for Organic Solid Waste Utilization, National Engineering Research Center for Organic-based Fertilizers, Jiangsu Collaborative Innovation Center for Solid Organic Waste Resource Utilization, Nanjing Agricultural University, Nanjing 210095, China

<sup>b</sup> Department of Soil and Crop Sciences, School of Integrative Plant Science, Cornell University, Ithaca, NY 14853, USA

<sup>c</sup> Key Laboratory of Agrometeorology of Jiangsu Province, School of Ecology and Applied Meteorology, Nanjing University of Information Science & Technology, Nanjing, 210044, China.

<sup>d</sup> College of Resources and Environment, Shanxi Agricultural University, Taigu, Shanxi 080301, China.

---

\* Corresponding author at: School of Ecology and Applied Meteorology, Nanjing University of Information Science & Technology, Nanjing, 210044, China; [003762@nuist.edu.cn](mailto:003762@nuist.edu.cn) (Jian Xiao)

\*\* Corresponding author at: Nanjing Agricultural University, Nanjing 210095, China; [Ranwei@njau.edu.cn](mailto:Ranwei@njau.edu.cn) (Wei Ran)

15 ***Flavonoid inputs from pig manure as a percentage of soil mass***

16 The content of flavonoids that obtained from pig manure after 7 years was calculated as  
17 follows:

18  $\text{Flavonoids stocks (Flavonoids}_{\text{stock}}, \text{ g ha}^{-1}) = \text{Flavonoids} * 12000 * 7 / 1000 = 11007.36$

19 Where *Flavonoids* are flavonoids content within the pig manure (131.04 mg kg<sup>-1</sup>), 12000 kg ha<sup>-1</sup>  
20 is the application of pig manure every year. 7 years is timing of application of pig manure.

21 On the assumption that the pig manure was applied only to the surface layer and the  
22 flavonoids didn't decompose, the flavonoids content in the surface layer was calculated as follows:

23  $\text{Flavonoids content (mg kg}^{-1}) = \text{Flavonoids}_{\text{stock}} / (\text{Bulk density} \times \text{Soil depth} \times \text{Area} \times 1000)$

24  $= 11007.36 / (1.15 \times 0.2 \times 10000 \times 1000)$

25  $= 4.78$

26 the units of *Bulk density* and *Soil depth* were t m<sup>-3</sup> and m, respectively, the unit of *Area* was m<sup>2</sup>  
27 and 1000 is a factor to adjust the units.

28 Therefore, flavonoid compounds input directly from pig manure should be less than 4.78 mg kg<sup>-1</sup>,  
29 due to the decomposition of flavonoid compounds, relatively.

Principal component analysis (PCA) is an extensive statistical technique that evaluates soil quality by calculating comprehensive scores <sup>1</sup>, following Equations (1) - (3) respectively:

$$W_{ij} = \theta_j / \sqrt{\lambda_i} \quad (1)$$

where  $W_{ij}$  is the weight of variables;  $\theta_j$  is the coefficient corresponding to each variable in the component matrix;  $\lambda_i$  is the eigenvalues in principal components (PCs).

$$F_i = W_{i1}X_1 + W_{i2}X_2 + \dots + W_{in}X_n \quad (2)$$

where  $F_i$  is the score of each PC;  $X_n$  is the normalized data

$$F = \sum_{i=1}^n \alpha_i F_i \quad (3)$$

where  $F$  is the comprehensive scores;  $n$  is the maximum number of PCs selected;  $\alpha_i$  is the percentage of variance in each PC.

***The composite score model in principal component analysis and formula F calculate ,***

$$F1 = 0.32 * x1 - 0.31 * x2 + 0.09 * x3 + 0.26 * x4 + 0.31 * x5 + 0.28 * x6 + 0.21 * x7 + 0.3 * x8 + 0.32 * x9 + 0.31 * x10 + 0.32 * x11 + 0.24 * x12 + 0.26 * x13$$

$$F2 = 0.02 * x1 - 0.05 * x2 + 0.64 * x3 - 0.38 * x4 + 0.17 * x5 + 0.05 * x6 + 0.49 * x7 - 0.2 * x8 - 0.04 * x9 - 0.11 * x10 + 0.08 * x11 + 0.08 * x12 - 0.34 * x13$$

***The comprehensive scores :***

$$F = 72.447 * F1 + 16.891 * F2$$

NPKM: 336.36, NPKS: -13.69; NPK: -99.0974; Control: -223.63

## 48 *Synthesis of 2-line ferrihydrite*

49 Dissolved 40 g  $\text{FeCl}_3 \cdot 6\text{H}_2\text{O}$  in 500 ml distilled water and added 330 ml M KOH to bring the  
50 pH to 7-8. The last 20 ml should be added drop-wise with constant checking of the pH. Stir  
51 vigorously, centrifuged at 8000 rpm for 10 min, and then washed five times rapidly until free from  
52 electrolytes. Freeze dried and ground for spectral analysis.

## 53 *UV-visible absorbance spectroscopy (UV-vis)*

54 UV-vis is a powerful approach for the detection of relevant model species of specific  
55 chromophores, notably phenolic groups <sup>2,3</sup>. In this study, the UV-vis absorbance was collected  
56 with a Shimadzu UV-vis double beam spectrophotometer with a 1 cm quartz cell at the wavelength  
57 range from 185-600 nm (UV-1700, Shimadzu, Japan). The UV-vis spectra of the solutions were  
58 conducted with an Agilent Cary 100 UV-visible spectrophotometer. Furthermore, the  
59 concentrations of total Fe were calculated using the ferrozine method at 560 nm <sup>4</sup>. The  
60 concentration of phosphate was checked using a Malachite Green Phosphate Assay Kit and the  
61 characteristic absorbance was measured at OD 620 nm.

## 62 *ATR-FTIR spectra and 2D correlation spectra (2D-COS) analysis*

63 ATR-FTIR and 2D-COS analysis can be used to investigate the details of metal-ligand  
64 interactions, including site heterogeneity, the sensitivity of binding, and the sequence of structural  
65 changes at the level of functional groups <sup>5,6</sup>. A Bruker Vertex 70 spectrometer (Bruker Optics Inc.,  
66 Billerica, MA) fitted with a Pike Gladi ATR accessory (Pike Technologies, Madison, WI) was  
67 used to acquire the ATR-FTIR spectra in the supernatant and pellet samples. Filtered supernatant  
68 solutions (0.22  $\mu\text{m}$ ) and pellet suspensions were dropped added-cast (5  $\mu\text{l}$ ) onto the internal  
69 reflection element (IRE) of the ATR-FTIR and dried under  $\text{N}_2$  flow before the spectra collection.  
70 All spectra were collected the wavelength from 4500 to 150  $\text{cm}^{-1}$ , and the spectra were  
71 representative of the average of 100 scans with 2  $\text{cm}^{-1}$  spectral resolution. After collection, the

72 spectra underwent atmospheric compensation, smoothed using nine-point Savitzky-Golay and the  
73 effect of instrumental drift was removed by baseline correction. All subsequent spectral processing  
74 was performed with OPUS v.7.2 software (Bruker Corp., Billerica, MA).

75 2D-COS analysis of the ATR-FTIR spectra was conducted using different concentrations of  
76 Fe as an external perturbation. The software was developed on the basis of the generalized 2D-  
77 COS analysis theory, and Noda reported the detailed algorithm <sup>6</sup>. Using the 2D Shige software  
78 offered by Kwansei-Gakuin University, all the 2D-COS computations and graphing functions were  
79 carried out. According to the established theories, the intensity sequential order being hidden can  
80 be determined using the change between  $\nu_1$  and  $\nu_2$  from the signs of synchronous correlation peak  
81  $\Phi(\nu_1, \nu_2)$  and asynchronous correlation peak  $\Psi(\nu_1, \nu_2)$  <sup>5</sup>. Briefly, if the same signs of  $\Phi(\nu_1, \nu_2)$   
82 and  $\Psi(\nu_1, \nu_2)$  in synchronous and asynchronous maps, the change of spectral intensity at  $\nu_1$  always  
83 precedes the intensity change at  $\nu_2$ , while if the opposite signs in  $\Phi(\nu_1, \nu_2)$  and  $\Psi(\nu_1, \nu_2)$ , the order  
84 is reversed and the spectral intensity change at  $\nu_1$  lags behind the intensity change at  $\nu_2$ . If  $\Psi(\nu_1,$   
85  $\nu_2)$  in the asynchronous map is zero, the changes occur simultaneously at  $\nu_1$  and  $\nu_2$  <sup>7</sup>. All ATR-  
86 FTIR spectra were baseline corrected by Fityk prior to 2D-COS analysis.

#### 87 ***FESEM characterization and HRTEM analysis***

88 FESEM and EDS were used to determine the size and morphology of the precipitates (i.e.,  
89 pellets) and to evaluate their elemental distribution, respectively <sup>8</sup>. The morphology was  
90 characterized using a Carl Zeiss Supra 55 with an extra high tension of 15 kV, a work distance  
91 from 8.6 to 8.8 nm, and elemental analysis was conducted with an Oxford Aztec X-Max 150.

92 HRTEM can be used to track the development of precipitates in their natural hydrated state  
93 with nanoscale resolution. Quercetin-Fe(III) and quercetin-Fe(III)-P precipitates were  
94 ultrasonically dispersed and dropped onto a grid of carbon-coated copper, air-dried and then

95 observed by HRTEM. The images were collected by HITACHI microscope (7500, Japan) at an  
96 acceleration voltage of 200 keV. Using ImageJ (<https://imagej.nih.gov/ij/download.html>), the  
97 particle-size distribution was estimated (NIH, Bethesda, MD, USA) <sup>9</sup>. In brief, the first step was  
98 to convert the pixel values into nanometers using scaling factor. The analysis was then done by  
99 selecting the particle analysis option on the ImageJ tool bar and converting it into binary images  
100 <sup>10</sup>. HRTEM and SAED observations were performed with a JEOL JEM-2100F microscope to  
101 complete data and image collection.

## 102 Figure Captions

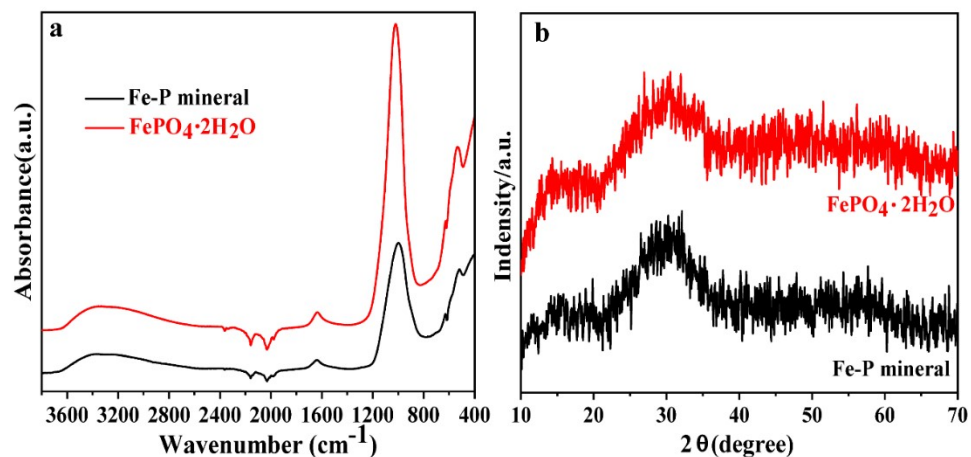

103

104 **Fig. S1** Characterization of synthetic iron-phosphate (Fe-P). (a) ATR-FTIR spectra of synthetic  
105 Fe-P mineral and pure FePO<sub>4</sub>·2H<sub>2</sub>O sample, (b) XRD patterns of synthetic Fe-P and pure  
106 FePO<sub>4</sub>·2H<sub>2</sub>O sample.

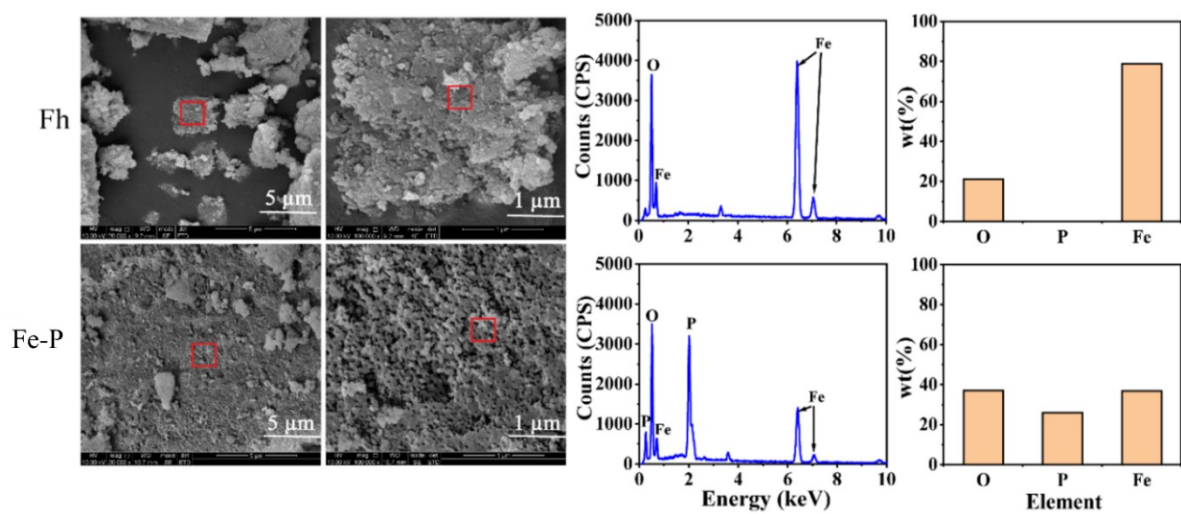

107

108 **Fig. S2** Scanning electronic microscopy (SEM) and energy-dispersive Spectrometer (EDS) of Fh

109 and Fe-P after freeze drying.

110



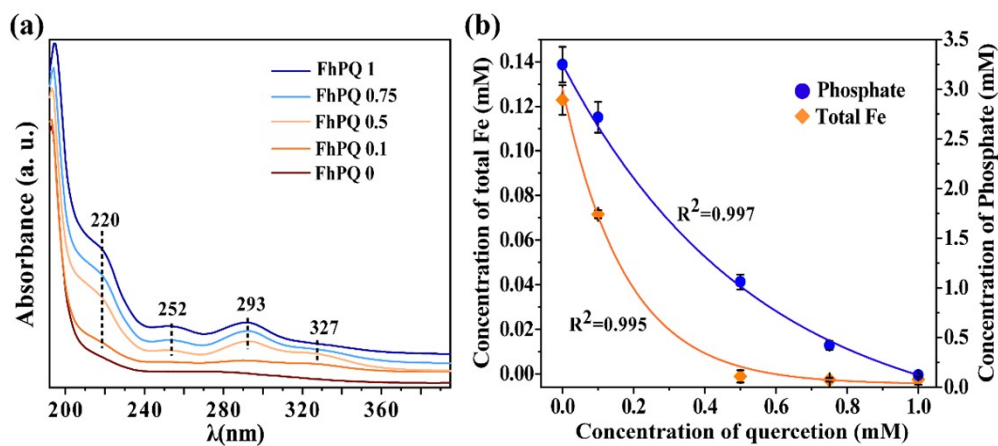

111

112 **Fig. S3** The functional groups and ions concentration of the FhPQ interfacial reaction. (a) UV-  
 113 visible spectra of solution that Fe-P active with different concentrations of quercetin. (b)  
 114 Concentration of total Fe ( $R^2 = 0.995$ ) and phosphate ( $R^2 = 0.997$ ) in Fe-P and different  
 115 concentrations of quercetin.

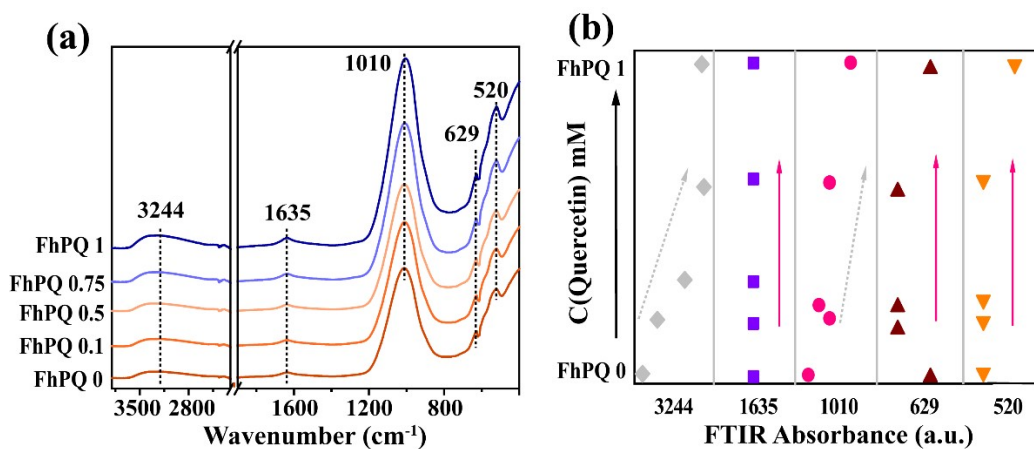

116

117 **Fig. S4** 1D ATR-FTIR spectra and 2D correlation maps generated from FhPQ complexes after Fe-  
 118 P and quercetin interfacial reaction. (a) 1D ATR-FTIR extracted from FhPQ, (b) Functional  
 119 variations of groups with concentration of quercetin in the range of 0–1mM.

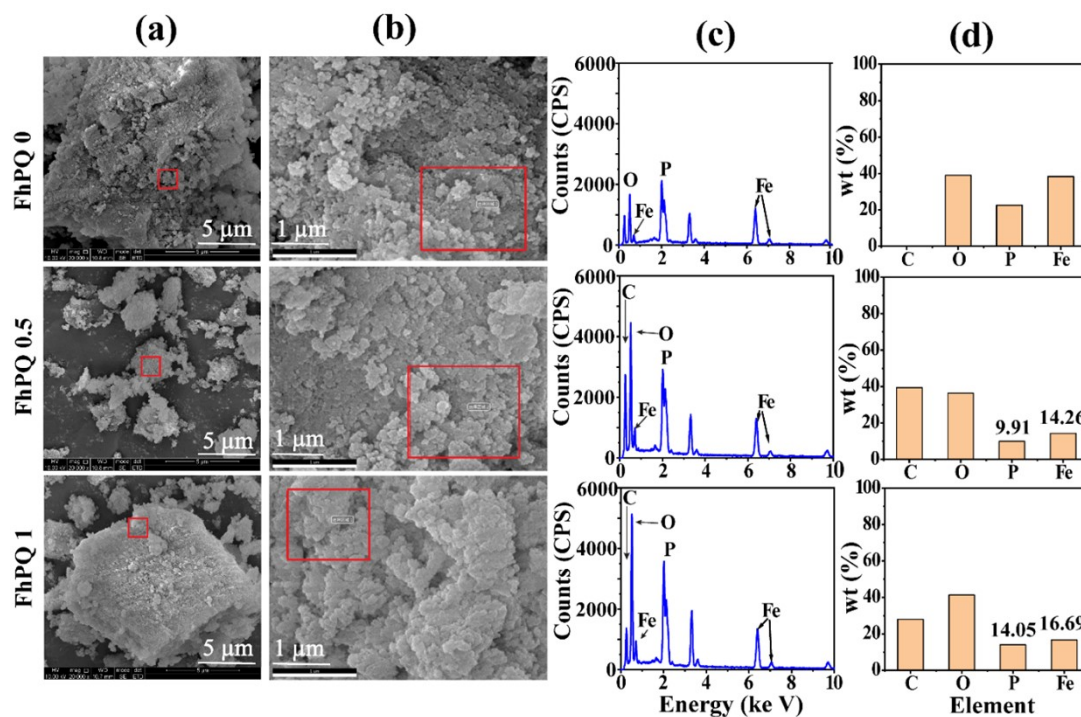

121

122 **Fig. S5** Scanning electronic microscopy (SEM) and energy-dispersive Spectrometer (EDS)  
 123 analysis of quercetin cultivated with Fe(III) under phosphate solution after 6 h. The red dots  
 124 represent the position of SEM analysis at 5 μm (a) and 1 μm (b). (c) EDS analysis using K-line  
 125 system at 200 nm. (d) The proportion of C, O, Fe elements in the red selected area.

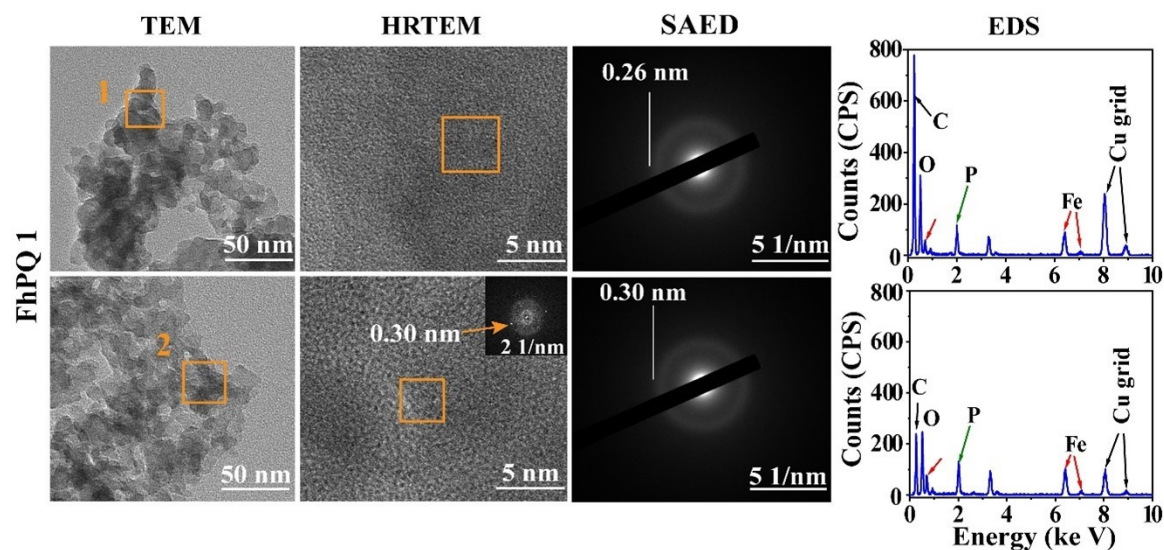

126

127 **Fig. S6** Micrographs of complexes accompanied by transmission electron microscopy (TEM)  
 128 images in the FhQ1 treatment, HRTEM and Fast Fourier Transform (FFT, inset image), selective  
 129 area electron diffraction (SAED) patterns, and energy dispersive spectroscopy (EDS) data. The  
 130 yellow squares represent the position of TEM analysis.

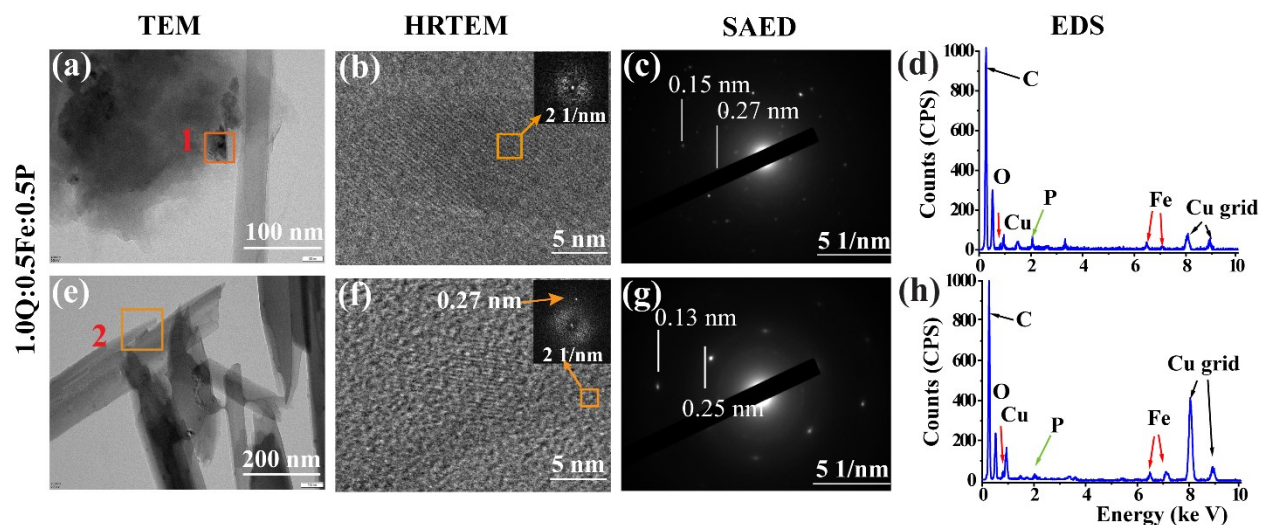

131

132 **Fig. S7** The surface characterization of ternary complex of quercetin-Fe(III)-phosphate after  
 133 coprecipitation. (a, e) Micrographs of the complex accompanied by transmission electron  
 134 microscopy (TEM) images in the 1.0Q:0.5Fe:0.5P treatment. (b, f) High resolution TEM  
 135 (HRTEM) images and Fast Fourier Transform (FFT, inset image). (c, g) Selective area electron  
 136 diffraction (SAED) patterns and (d, h) energy dispersive spectroscopy (EDS) data, which  
 137 confirmed the occurrence of 2-line ferrihydrite nanoparticles<sup>11–13</sup>. The orange squares represent  
 138 the position of TEM analysis.

139 **Table S1** Soil physicochemical properties and the content of reactive minerals in paddy surface  
140 soil after different fertilizers

|                                    | Control             | NPK                 | NPKM                | NPKS               |
|------------------------------------|---------------------|---------------------|---------------------|--------------------|
| EC $\mu\text{s cm}^{-1}$           | 94.2 $\pm$ 2.1 c    | 114.03 $\pm$ 4.3 b  | 123.03 $\pm$ 1.4 a  | 120.8 $\pm$ 4.6 a  |
| DOC mg kg <sup>-1</sup>            | 95.6 $\pm$ 0.6 b    | 86 $\pm$ 0.3 c      | 105 $\pm$ 1 a       | 90 $\pm$ 0.5 b     |
| Available N mg kg <sup>-1</sup>    | 122.5 $\pm$ 2.4 c   | 125.9 $\pm$ 0.5 c   | 184.8 $\pm$ 4.0 a   | 148.1 $\pm$ 4.9 b  |
| Available P mg kg <sup>-1</sup>    | 13.9 $\pm$ 1.5 b    | 25.8 $\pm$ 1.3 a    | 35.9 $\pm$ 2.2 a    | 27.9 $\pm$ 2.6 a   |
| Available K mg kg <sup>-1</sup>    | 60.8 $\pm$ 5 b      | 60.5 $\pm$ 3.5 b    | 67.8 $\pm$ 1.2 ab   | 74.8 $\pm$ 5.4 a   |
| SOC g kg <sup>-1</sup>             | 16.51 $\pm$ 1.01 b  | 16.16 $\pm$ 0.88 b  | 20.40 $\pm$ 0.91 a  | 17.06 $\pm$ 0.69 b |
| Total N g kg <sup>-1</sup>         | 1.57 $\pm$ 0.10 b   | 1.57 $\pm$ 0.08 b   | 2.15 $\pm$ 0.05 a   | 1.71 $\pm$ 0.04 b  |
| Total P g kg <sup>-1</sup>         | 0.60 $\pm$ 0.10 b   | 0.69 $\pm$ 0.04 ab  | 0.95 $\pm$ 0.01 a   | 0.74 $\pm$ 0.01 ab |
| Total K g kg <sup>-1</sup>         | 20.16 $\pm$ 0.07 a  | 19.53 $\pm$ 0.52 ab | 19.20 $\pm$ 0.69 ab | 18.85 $\pm$ 0.38 b |
| Ca <sub>o</sub> g kg <sup>-1</sup> | 0.09 $\pm$ 0.002 a  | 0.09 $\pm$ 0.002 a  | 0.11 $\pm$ 0.008 a  | 0.10 $\pm$ 0.01 a  |
| Si <sub>o</sub> g kg <sup>-1</sup> | 0.33 $\pm$ 0.005 b  | 0.30 $\pm$ 0.002 c  | 0.38 $\pm$ 0.007 a  | 0.30 $\pm$ 0.007 c |
| Mg <sub>o</sub> g kg <sup>-1</sup> | 0.419 $\pm$ 0.009 b | 0.39 $\pm$ 0.01 c   | 0.52 $\pm$ 0.006 a  | 0.39 $\pm$ 0.01 c  |
| Comprehensive<br>score             | -223.63             | -99.0974            | 336.36              | -13.69             |

141 DOC, dissolves organic carbon; SOC, soil organic carbon; Ca<sub>o</sub>, Si<sub>o</sub>, Mg<sub>o</sub>, the oxalate-extractable  
142 Ca, Si, and Mg; Letters a-c represent significant differences among different fertilizer treatments  
143 at the level of  $P < 0.05$ .

144

145

146

147

148

149

150

151

152 **Table S2** Specific surface area, pore characteristics and surface coverages (SC%) of Fh and FhP

| Sample | SSA<br>(m <sup>2</sup> /g) | TPV <sup>a</sup><br>(mm <sup>3</sup> /g) | MEV <sup>a</sup><br>(mm <sup>3</sup> /g) |             | Mesopore pore<br>area (m <sup>2</sup> /g) |             | MIV <sup>a</sup><br>(mm <sup>3</sup> /g) | Micropore<br>pore area<br>(m <sup>2</sup> /g) | SC% <sup>b</sup> |
|--------|----------------------------|------------------------------------------|------------------------------------------|-------------|-------------------------------------------|-------------|------------------------------------------|-----------------------------------------------|------------------|
|        |                            |                                          | 2-10<br>nm                               | 10-50<br>nm | 2-10<br>nm                                | 10-50<br>nm |                                          |                                               |                  |
| Fh     | 201.46                     | 261.13                                   | 123.64                                   | 109.58      | 121.07                                    | 26.26       | 17.19                                    | 18.00                                         | -                |
| FhP    | 130.77                     | 437.82                                   | 121.79                                   | 308.13      | 82.51                                     | 58.39       | 0.3                                      | 0.818                                         | 24.61            |

153 Note: SSA: Specific surface area; <sup>a</sup> TPV = total pore volume, MEV = mesopore volume, MIV =  
154 micropore volume; <sup>b</sup> SC% =  $(1 - \text{SSA}_{\text{FhP}} / \text{SSA}_{\text{Fh}}) \times 100$

155

156 **Table S3** Identification of absorption bands in quercetin-Fe(III) cultivation system, adapted from  
157 assignments provided in references

| Position (cm <sup>-1</sup> ) | Possible assignment                                                                             | Reference |
|------------------------------|-------------------------------------------------------------------------------------------------|-----------|
| 3736                         | O-H stretching vibration of phenol/P-OH in surface                                              | 14-16     |
| 2954, 2843                   | C-H Alkanes                                                                                     | 5         |
| 2361, 1418                   | C=C Alkynes/ $\nu_s(\text{COO-})$ /-C(=O) OH                                                    | 14,15     |
| 1164, 1113                   | $\nu(\text{C-O-C})$ stretching/ $\nu(\text{C-O-P, P-O-P})$ / $\nu(\text{C-O})$ /ring vibrations | 14,17     |
| 1016                         | $\nu(\text{P-OFe})$ , ring vibrations                                                           | 15        |
| 613, 474                     | Fe-O stretching/C-O-Fe                                                                          | 2,14      |

158

## 159 References

- 1601 J. P. Martín-Sanz, A. de Santiago-Martín, I. Valverde-Asenjo, J. R. Quintana-Nieto, C.  
161 González-Huecas and A. L. López-Lafuente, Comparison of soil quality indexes calculated by  
162 network and principal component analysis for carbonated soils under different uses, *Ecol.*  
163 *Indic.*, 2022, **143**, 109374.
- 1642 A. Raza, X. Xu, L. Xia, C. Xia, J. Tang and Z. Ouyang, Quercetin-iron complex: synthesis,  
165 characterization, antioxidant, DNA binding, DNA cleavage, and antibacterial activity studies, *J*  
166 *Fluoresc.*, 2016, **26**, 2023–2031.
- 1673 H. Xu, M. Yan, W. Li, H. Jiang and L. Guo, Dissolved organic matter binding with Pb(II) as  
168 characterized by differential spectra and 2D UV–FTIR heterospectral correlation analysis,  
169 *Water Re.*, 2018, **144**, 435–443.
- 1704 S. P. Wolff, Ferrous ion oxidation in presence of ferric ion indicator xylenol orange for  
171 measurement of hydroperoxides, in *Methods in Enzymology*, 1994, **233**, 182–189.
- 1725 P. Lasch and I. Noda, Two-Dimensional Correlation Spectroscopy (2D-COS) for Analysis of  
173 Spatially Resolved Vibrational Spectra, *Appl Spectrosc.*, 2019, **73**, 359–379.
- 1746 I. Noda, Two-dimensional correlation spectroscopy — Biannual survey 2007–2009, *J. Mol.*  
175 *Struct.*, 2010, **974**, 3–24.
- 1767 W. Yan, H. Wang and C. Jing, Adhesion of *Shewanella oneidensis* MR-1 to goethite: A two-  
177 dimensional correlation spectroscopic study, *Environ. Sci. Technol.*, 2016, **50**, 4343–4349.
- 1788 A. Mohamed, L. Yu, Y. Fang, N. Ashry, Y. Riahi, I. Uddin, K. Dai and Q. Huang, Iron mineral-  
179 humic acid complex enhanced Cr(VI) reduction by *Shewanella oneidensis* MR-1,  
180 *Chemosphere*, 2020, **247**, 125902.
- 1819 Z. Li, L. Liu, J. Chen and H. H. Teng, Cellular dissolution at hypha- and spore-mineral  
182 interfaces revealing unrecognized mechanisms and scales of fungal weathering, *Geology*, 2016,  
183 **44**, 319–322.
- 18410 G. H. A. J. J. Kumara, K. Hayano, K. Ogiwara, Image analysis techniques on evaluation of  
185 particle size distribution of gravel, *Internat. J. Geomate*, 2012, **3**, 290–297.
- 18611 G.H. Yu, Z.L. Chi, A. Kappler, F.S. Sun, C.Q. Liu, H. H. Teng and G. M. Gadd, Fungal  
187 nanophase particles catalyze iron transformation for oxidative stress removal and iron  
188 acquisition, *Curr. Biol.*, 2020, **30**, 2943-2950.e4.
- 18912 G.H. Yu, Z.L. Chi, H. H. Teng, H.L. Dong, A. Kappler, M. R. Gillings, M. L. Polizzotto, C.Q.  
190 Liu and Y.G. Zhu, Fungus-initiated catalytic reactions at hyphal-mineral interfaces drive iron  
191 redox cycling and biomineralization, *Geochim. Cosmochim. Ac.*, 2019, **260**, 192–203.
- 19213 J. Baumgartner, G. Morin, N. Menguy, T. Perez Gonzalez, M. Widdrat, J. Cosmidis and D.  
193 Faivre, Magnetotactic bacteria form magnetite from a phosphate-rich ferric hydroxide via  
194 nanometric ferric (oxyhydr)oxide intermediates, *Proc. Natl. Acad. Sci. U.S.A.*, 2013, **110**,  
195 14883–14888.
- 19614 P. Papan, J. Kantapan, P. Sangthong, P. Meepowpan and N. Dechsupa, Iron (III)-quercetin  
197 complex: Synthesis, physicochemical characterization, and MRI cell tracking toward potential  
198 applications in regenerative medicine, *Contrast Media Mol. I.*, 2020, **2020**, 1–22.
- 19915 E. J. Elzinga, J.H. Huang, J. Chorover and R. Kretzschmar, ATR-FTIR spectroscopy study of  
200 the influence of pH and contact time on the adhesion of *Shewanella putrefaciens* bacterial cells  
201 to the surface of hematite, *Environ. Sci. Technol.*, 2012, **46**, 12848–12855.



20216 Y. Zhu, B. Huang, Z. Zhu, H. Liu, Y. Huang, X. Zhao and M. Liang, Characterization,  
 203 dissolution and solubility of the hydroxypyromorphite–hydroxyapatite solid solution  
 204  $[(\text{Pb}_x\text{Ca}_{1-x})_5(\text{PO}_4)_3\text{OH}]$  at 25 °C and pH 2–9. *Geochem. Trans.*, 2016, **17**, 2.  
 20517 W. Chen, C. Qian, X.Y. Liu and H.Q. Yu, Two-dimensional correlation spectroscopic analysis  
 206 on the interaction between humic acids and  $\text{TiO}_2$  nanoparticles, *Environ. Sci. Technol.*, 2014,  
 207 **48**, 11119–11126.
